# Supplementary material for: Multilayered MoAlB@MBene structures using mild microwave-assisted etching and their optical properties
Source: Royal Society of Chemistry journal article supplement (doi:10.1039/d4mh01500b), 2025-01-01
Supplement: d4mh01500b1.pdf [file d4mh01500b1.pdf]

*Supplementary Information*

# Multilayered MoAlB@MBene using Mild Microwave-Assisted Etching and their Optical Properties

*Madhurya Chandel<sup>1\*</sup>, Muhammad Abiyyu Kenichi Purbayanto<sup>1</sup>, Dominik Kowal<sup>2</sup>, Dorota Moszczyńska<sup>3</sup>, Anna Wójcik<sup>4</sup>, Muhammad Danang Birowosuto<sup>2</sup>, Michael Naguib<sup>5</sup>, Agnieszka Maria Jastrzebska<sup>1\*</sup>*

<sup>1</sup>Faculty of Mechatronics, Warsaw University of Technology, św. Andrzeja Boboli 8, 02-525 Warsaw, Poland

<sup>2</sup>Łukasiewicz Research Network-PORT Polish Center for Technology Development, Stabłowicka 147, 54-066, Wrocław, Poland

<sup>3</sup>Faculty of Materials Science and Engineering, Warsaw University of Technology, Wołoska 141, 02-507, Poland

<sup>4</sup>Polish Academy of Sciences, Institute of Metallurgy and Materials Science, W. Reymonta 25, 30-059 Cracow, Poland

<sup>5</sup>Tulane University, Department of Physics and Engineering Physics, New Orleans, LA 70118, USA

\*E-mail: madhurya.chandel@pw.edu.pl, agnieszka.jastrzebska@pw.edu.pl

## **Chemicals and Reagents Used**

Hydrochloric acid (HCl) with 37 % (v/v) concentration from Merk; Sodium hydroxide (NaOH, 0.1 M), 30 % (v/v) water solution of hydrogen peroxide (H<sub>2</sub>O<sub>2</sub>) from chempur, double distilled water was used. Molybdenum boride (MoB) and aluminum (#325 mesh; 44 μm) powders were purchased from Alfa Aesar for MoAlB synthesis. All the chemicals were used without further purification.

## **Synthesis of MAB phase (MoAlB)**

The MoAlB MAB phase was synthesized using direct mixing of precursor powders i.e. Molybdenum boride (MoB) and aluminum (#325 mesh; 44 μm) powders. The MoB and aluminum powders were mixed in a ratio of 1:1.2. After mixing these two powders, it was pressed and heated in a Turbula T2F mixer for 3 h at 56 rpm. For mixing media 10 mm yttria-stabilized zirconia balls were used. After that, mixed powders were pressed into 12 g pellets. It was heated at 750 °C for 2 h, then 1500 °C for another 2 h, at a heating rate of 10 °C/min in a tube furnace under an argon atmosphere (with flow rate 100 standard cm<sup>3</sup>/min, SCCM). The obtained solid samples were ultimately cooled to room temperature and ground down to #325 mesh.

## **Detailed protocol for the etching of Al from the MoAlB phase**

### **MAB@MBene (Without pre-treatment)**

Initially, 250 mg of MoAlB was added slowly into 20 mL of 0.6 M HCl solution with constant stirring, followed by sonication for 2 minutes. After that 20 μl of H<sub>2</sub>O<sub>2</sub> (30%) solution was added dropwise and closed the lid of the Teflon container. Once the microwave is fitted, the reaction starts as per the designed program (Program: temperature: 150 °C, reaction time 120 min (40 min each in 3 cycles), and microwave power: 480W). After completion, the supernatant was navy blue, and the precipitate was black. After five washing using centrifugation (3000 RPM for 4 min), the reaction mixture pH becomes 6. The precipitate was collected and used further for characterization.

### **Base-MAB@MBene (With NaOH pre-treatment)**

**Pretreatment:** Firstly, 250 mg of MoAlB was added into 0.1 M NaOH and stirred for 2h, then washed with distilled water till pH became 6.

**Microwave treatment:** The washed precipitate was slowly transferred into 20 mL of 0.6 M HCl with constant stirring, followed by sonication for 2 min. After that, 250  $\mu$ l of H<sub>2</sub>O<sub>2</sub> (30%) was added dropwise and closed the lid of the Teflon container. Once the microwave was fitted, the reaction started as per the designed program (Program: Temperature: 150 °C, reaction time 120 min (40 min each in 3 cycles), and microwave power 480 W). After completion, the supernatant was yellow, and the precipitate was black. After five washing using centrifugation (3000 RPM for 4 min), the reaction mixture pH becomes 6. The black precipitate was collected and used further for characterization.

#### **Acid-MAB@MBene (With HCl pre-treatment)**

**Pretreatment:** Initially, 250 mg of MoAlB was stirred in 0.1 M HCl for 2h, then washed with distilled water till pH became 6.

**Microwave treatment:** The washed precipitate was slowly transferred into 20 mL of 0.6 M HCl with constant stirring, followed by sonication for 2 min. After that, 250  $\mu$ l of H<sub>2</sub>O<sub>2</sub> (30%) solution was added dropwise and closed the lid of the Teflon container. Once the microwave was fitted, the reaction started as per the designed program (Program: Temperature: 150 °C, reaction time 120 min (40 min each in 3 cycles), and microwave power 480 W). After completion, the supernatant was Yellow, and the precipitate was black. After five washing using centrifugation (3000 RPM for 4 min), the reaction mixture pH becomes 6 (measured using pH Paper). The black precipitate was collected and used further for characterization.

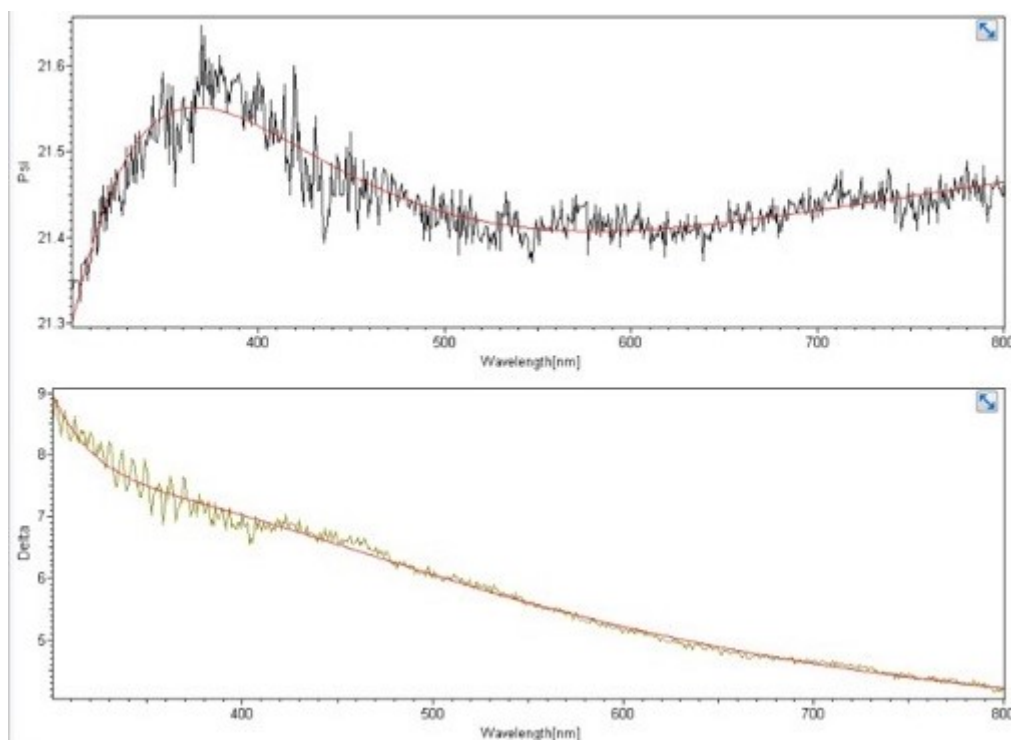

**Figure S1.** The  $\Psi$  and  $\Delta$  at the incident angle of  $45^\circ$  of the representative sample (MAB@MBene)

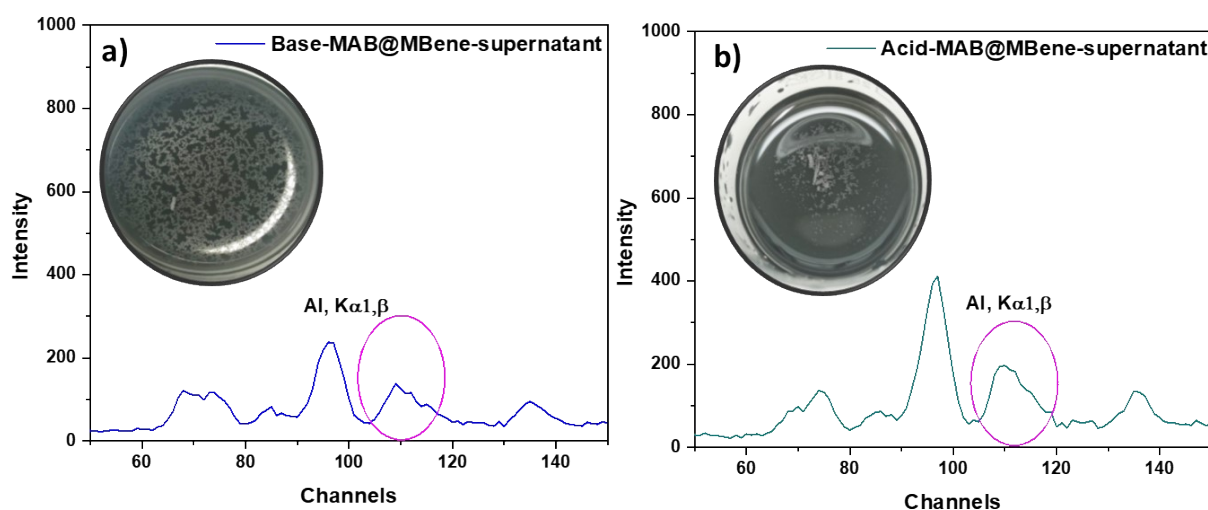

**Figure S2** XRF spectra of Al  $K\alpha$  peak for the supernatant after pre-treatment (a) 0.1 M NaOH and (b) 0.1 M HCl. Inset is the digital photograph of the respective reaction mixture.

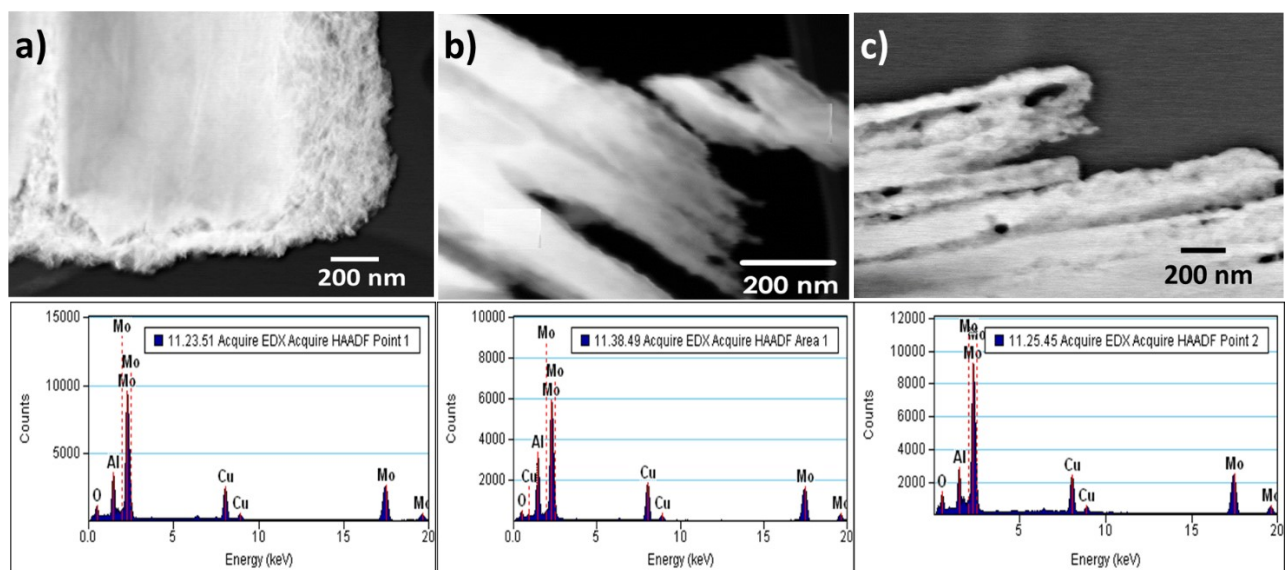

**Figure S3** TEM images and corresponding EDS of (a) MAB@MBene, (b) Base-MAB@MBene, and (c) Acid-MAB@MBene.

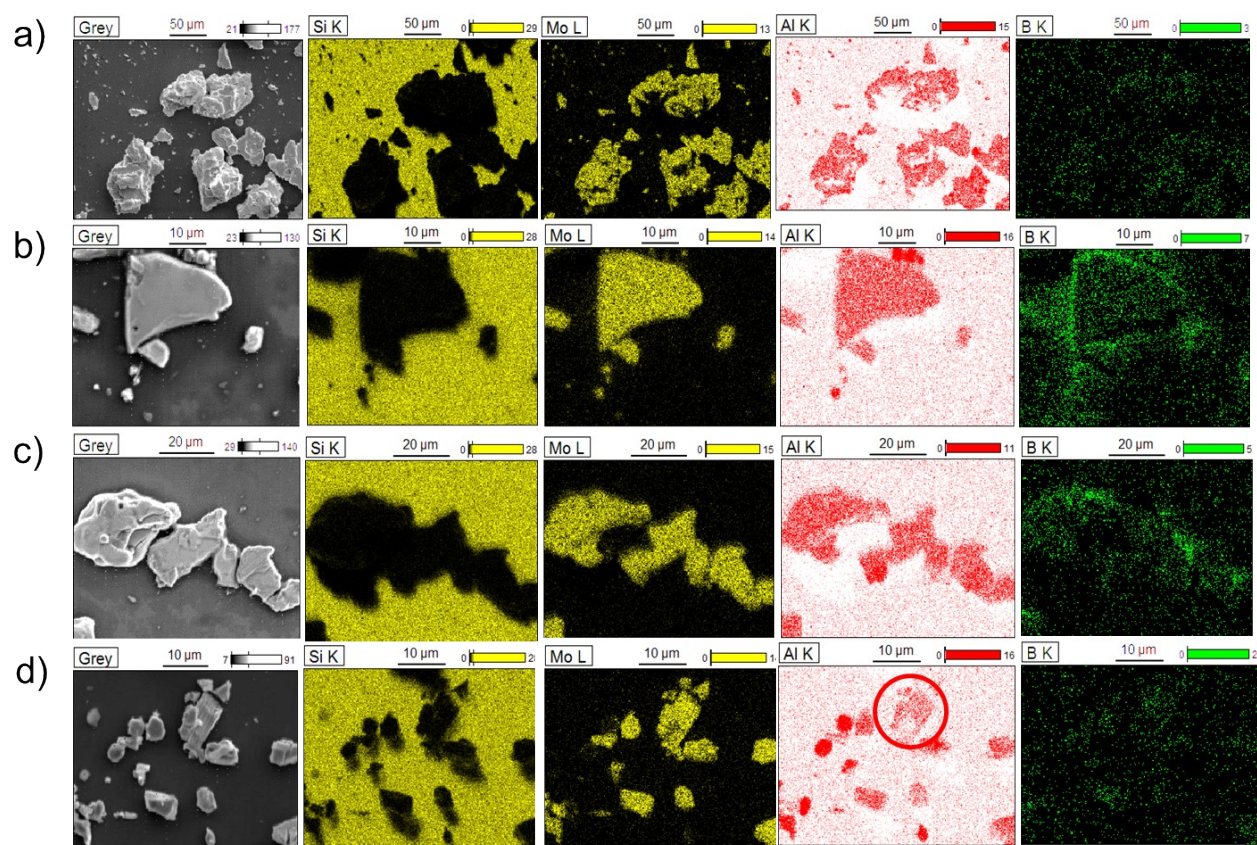

**Figure S4** SEM images and elemental mapping of (a) MoAlB, (b) MAB@MBene, (c) Base-MAB@MBene, and (d) Acid-MAB@MBene. The circled area is a highlight of the accordion-like structure

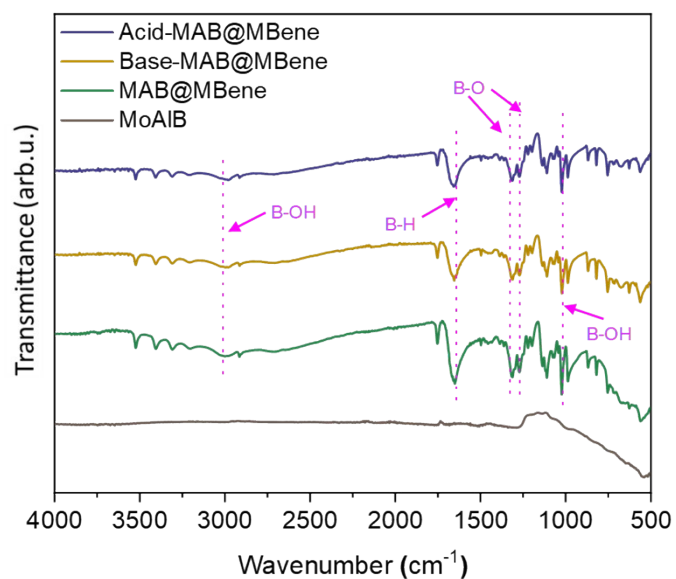

**Figure S5** FT-IR spectra of MoAIB, MAB@MBene, Base-MAB@MBene and Acid-MAB@MBene.

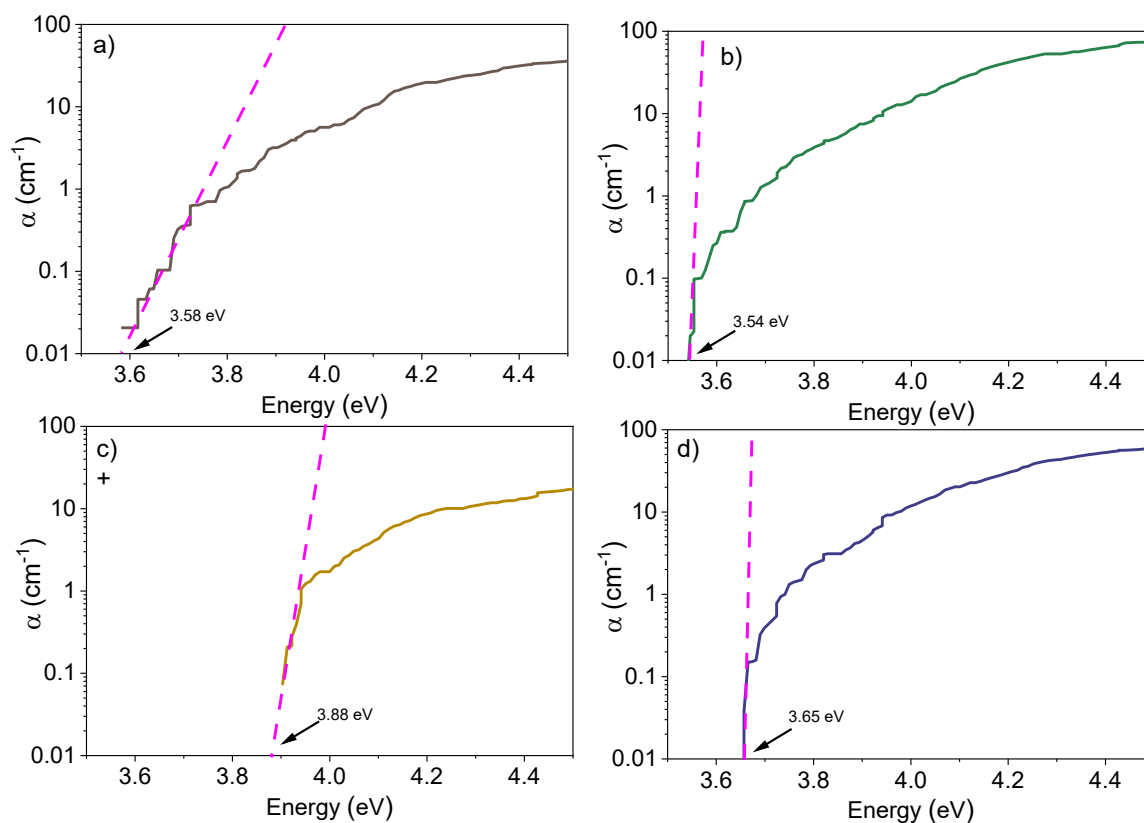

**Figure S6.** The estimated bandgap is based on the absorption spectra of (a) MoAIB, (b) MAB@MBene, (c) Base-MAB@MBene, and (d) Acid-MAB@MBene.

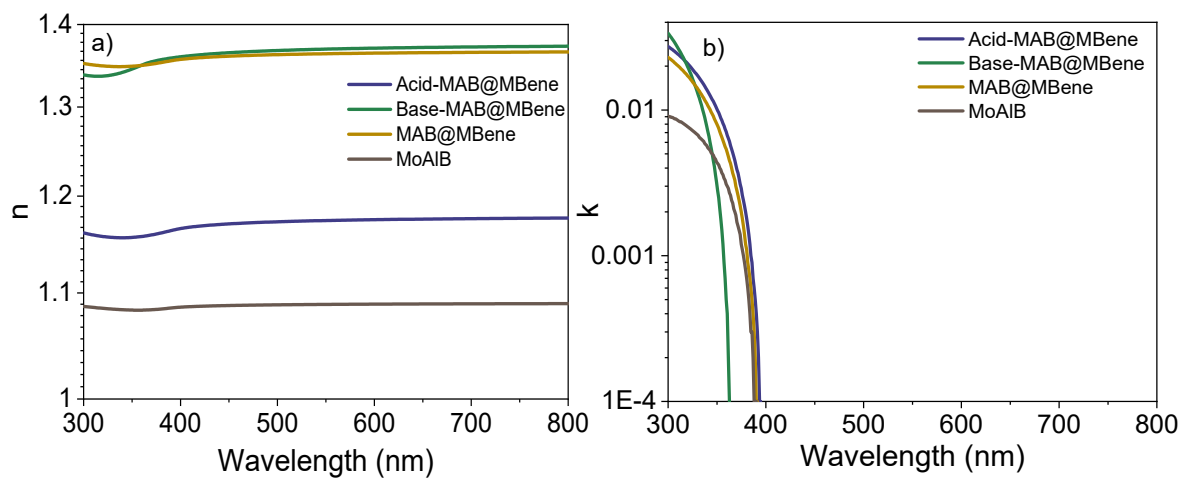

**Figure S7.** a) Refractive index ( $n$ ) and b) extinction coefficients ( $k$ ) of MoAIB, MAB@MBene, Base-MAB@MBene, and Acid-MAB@MBene.

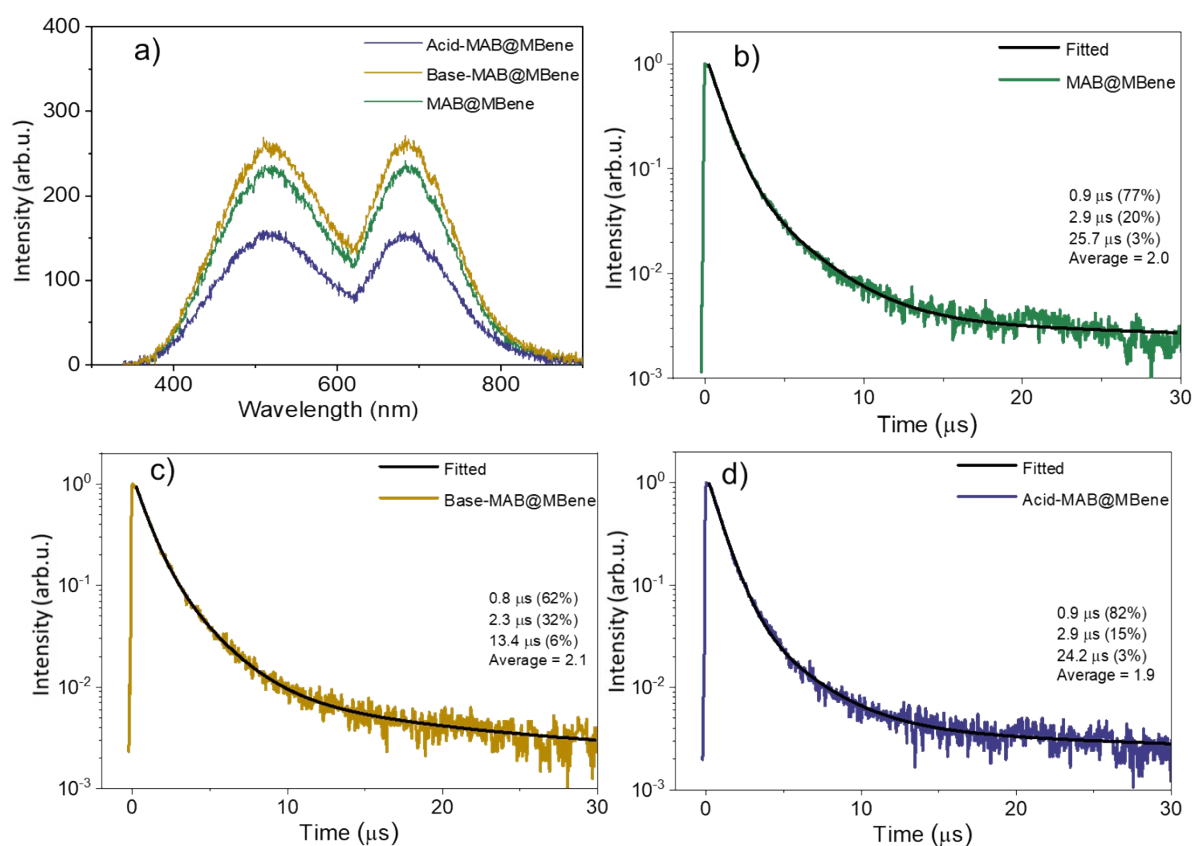

**Figure S8** a) The photoluminescence measurements of MAB@MBene, Base-MAB@MBene and Acid-MAB@MBene. Steady-state and time-resolved photoluminescence measurements of

b) MAB@MBene, c) Base-MAB@MBene, and d) Acid-MAB@MBene with emission above 600 nm. All measurements were excited at 266 nm and room temperature.

**Table S1.** Results of the Elemental composition of the MoAlB sample using EDS

| Element | Weight % [ $\pm$ Error] | Atom % [ $\pm$ Error] |
|---------|-------------------------|-----------------------|
| B       | 1.25 $\pm$ 0.10         | 2.46 $\pm$ 0.19       |
| Al      | 4.30 $\pm$ 0.06         | 4.87 $\pm$ 0.07       |
| Si      | 77.05 $\pm$ 0.21        | 86.93 $\pm$ 0.23      |
| Mo      | 17.40 $\pm$ 0.15        | 5.74 $\pm$ 0.05       |

Mo:Al:B atomic ratio 1: 0.85: 0.43

**Table S2.** Results of the Elemental composition of the MAB@MBene sample using EDS

| Element | Weight % [ $\pm$ Error] | Atom % [ $\pm$ Error] |
|---------|-------------------------|-----------------------|
| B       | 4.24 $\pm$ 0.12         | 8.53 $\pm$ 0.24       |
| Al      | 3.93 $\pm$ 0.06         | 4.50 $\pm$ 0.07       |
| Si      | 68.98 $\pm$ 0.19        | 79.30 $\pm$ 0.22      |
| Mo      | 22.85 $\pm$ 0.22        | 7.67 $\pm$ 0.07       |

Mo:Al:B atomic ratio 1: 0.96: 1.11

**Table S3.** Results of the Elemental composition of the Base-MAB@MBene sample using EDS

| Element | Weight % [ $\pm$ Error] | Atom % [ $\pm$ Error] |
|---------|-------------------------|-----------------------|
| B       | 2.26 $\pm$ 0.11         | 4.82 $\pm$ 0.23       |
| Al      | 2.11 $\pm$ 0.06         | 3.22 $\pm$ 0.08       |
| Si      | 67.78 $\pm$ 0.19        | 82.04 $\pm$ 0.23      |
| Mo      | 27.85 $\pm$ 0.18        | 9.92 $\pm$ 0.06       |

Mo:Al:B atomic ratio 1: 0.32: 0.48



**Table S4.** Results of the Elemental composition of the Acid-MAB@MBene sample using EDS

| Element | Weight % [ $\pm$ Error] | Atom % [ $\pm$ Error] |
|---------|-------------------------|-----------------------|
| B       | 2.75 $\pm$ 0.22         | 5.14 $\pm$ 0.42       |
| Al      | 1.36 $\pm$ 0.14         | 2.52 $\pm$ 0.16       |
| Si      | 83.92 $\pm$ 0.40        | 89.60 $\pm$ 0.42      |
| Mo      | 11.97 $\pm$ 0.44        | 5.44 $\pm$ 0.14       |

Mo:Al:B atomic ratio 1: 0.46: 0.94

**Table S5. XPS peak component fitting analysis of MAB@MBene.**

| Element            | Element at% | Binding energy (eV) | Component name                 | Component at% |
|--------------------|-------------|---------------------|--------------------------------|---------------|
| Mo 3d 5/2 (3d 3/2) | 0.7         | 231.3 (234.5)       | Mo <sub>2</sub> O <sub>5</sub> | 0.5           |
|                    |             | 232.5 (235.7)       | MoO <sub>3</sub>               | 0.2           |
| Al 2p              | 0.1         | 74.2                | Al <sub>2</sub> O <sub>3</sub> | 0.1           |
| B 1s               | 0.2         | 192.8               | B <sub>2</sub> O <sub>3</sub>  | 0.2           |

**Table S6. XPS peak component fitting analysis of Base-MAB@MBene.**

| Element            | Element at% | Binding energy (eV) | Component name                                    | Component at% |
|--------------------|-------------|---------------------|---------------------------------------------------|---------------|
| Mo 3d 5/2 (3d 3/2) | 1.3         | 231.1 (234.3)       | MoCl <sub>5</sub> /Mo <sub>2</sub> O <sub>5</sub> | 0.5           |
|                    |             | 232.5 (235.8)       | MoO <sub>3</sub>                                  | 0.8           |
| Al 2p              | 0.5         | 74.5                | Al <sub>2</sub> O <sub>3</sub>                    | 0.1           |
|                    |             | 75.4                | AlO(OH)                                           | 0.3           |
|                    |             | 76.4                | AlCl <sub>3</sub>                                 | 0.1           |
| B 1s               | 0.4         | 193.0               | B <sub>2</sub> O <sub>3</sub>                     | 0.4           |

**Table S7. XPS peak component fitting analysis of Acid-MAB@MBene.**

| Element            | Element at% | Binding energy (eV) | Component name                 | Component at% |
|--------------------|-------------|---------------------|--------------------------------|---------------|
| Mo 3d 5/2 (3d 3/2) | 0.9         | 230.7 (233.9)       | MoO <sub>2</sub>               | 0.2           |
|                    |             | 232.1 (235.3)       | MoO <sub>3</sub>               | 0.7           |
| Al 2p              | 0.3         | 73.9                | Al <sub>2</sub> O <sub>3</sub> | 0.1           |
|                    |             | 76                  | AlCl <sub>3</sub>              | 0.2           |
| B 1s               | -           | 193.1               | B <sub>2</sub> O <sub>3</sub>  | -             |

**Table S8. Extracted parameters from the fitting of TRPL curves**

| <b>Samples</b> | <b><math>\tau_1</math> (<math>\mu\text{s}</math>)</b> | <b><math>C_1</math> (%)</b> | <b><math>\tau_2</math> (<math>\mu\text{s}</math>)</b> | <b><math>C_2</math> (%)</b> | <b><math>\tau_3</math> (<math>\mu\text{s}</math>)</b> | <b><math>C_3</math> (%)</b> | <b><math>\tau_{\text{avg}}</math> (ns)</b> |
|----------------|-------------------------------------------------------|-----------------------------|-------------------------------------------------------|-----------------------------|-------------------------------------------------------|-----------------------------|--------------------------------------------|
| MAB@MBene      | 0.9                                                   | 77                          | 2.9                                                   | 20                          | 25.7                                                  | 3                           | 2.0                                        |
| Base-MAB@MBene | 0.8                                                   | 62                          | 2.3                                                   | 32                          | 13.4                                                  | 6                           | 2.1                                        |
| Acid-MAB@MBene | 0.9                                                   | 82                          | 2.9                                                   | 15                          | 24.2                                                  | 3                           | 1.9                                        |

## Reference

- (1) Li, X.; Cui, H.; Zhang, R. First-Principles Study of the Electronic and Optical Properties of a New Metallic MoAlB. *Sci Rep* **2016**, 6 (1), 39790.
